# Supplementary material
Source: PubMed Central journal article supplement (PMC5733640)
Supplement: NIHMS885917-supplement-supplement_1.pdf [file NIHMS885917-supplement-supplement_1.pdf]

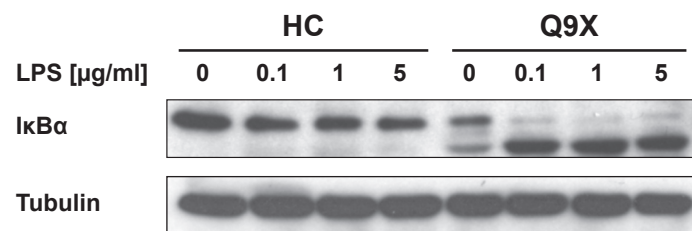

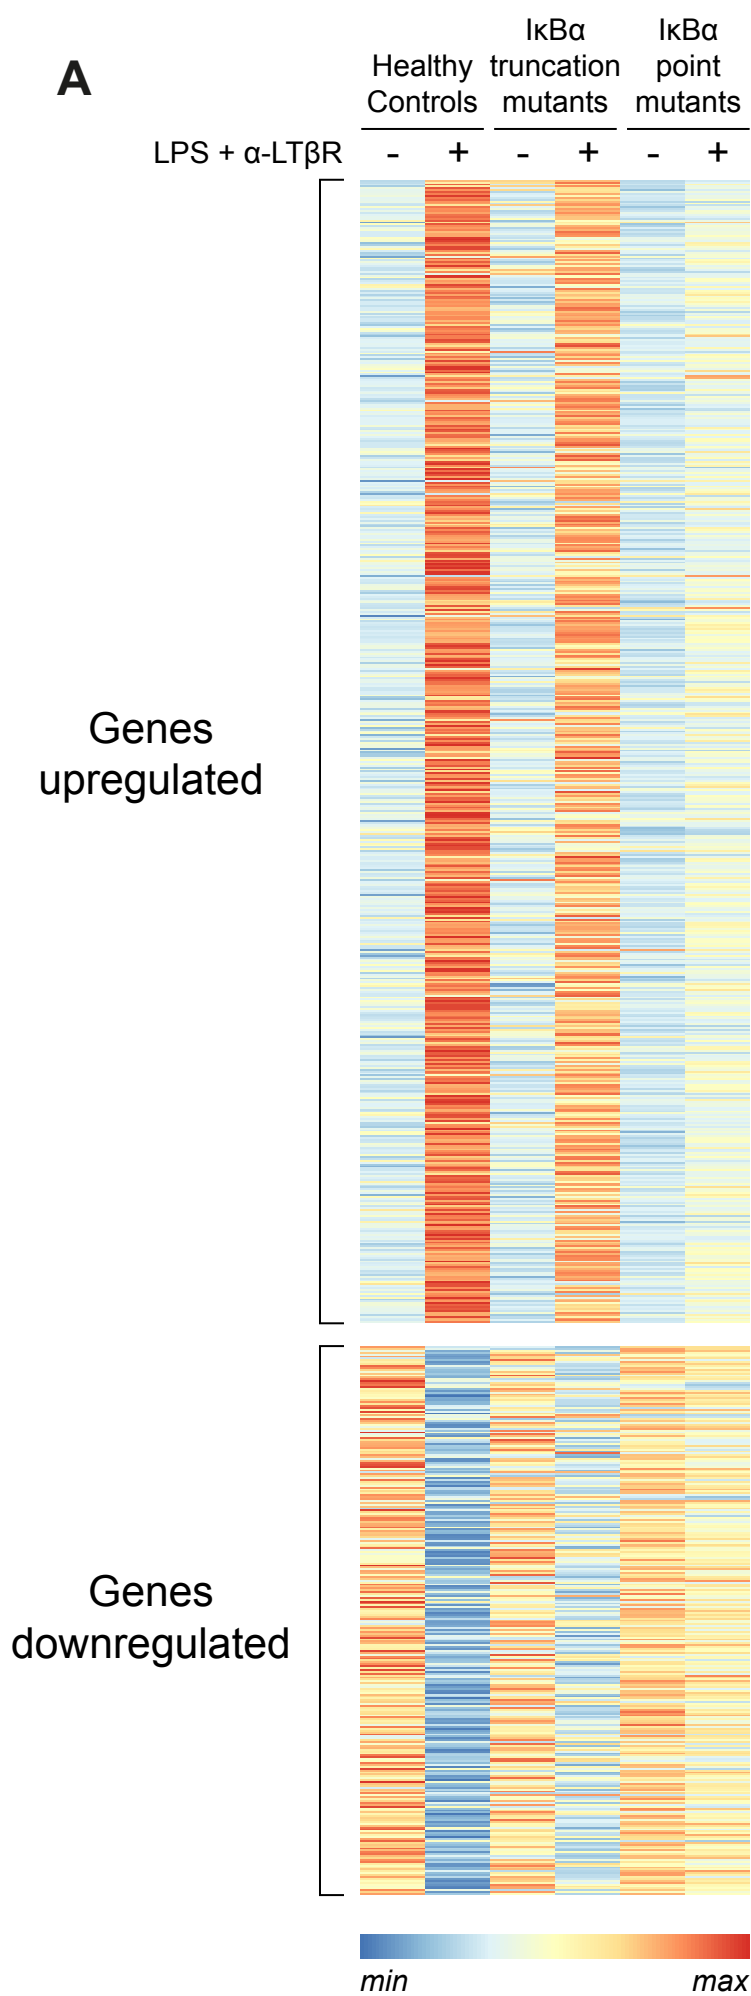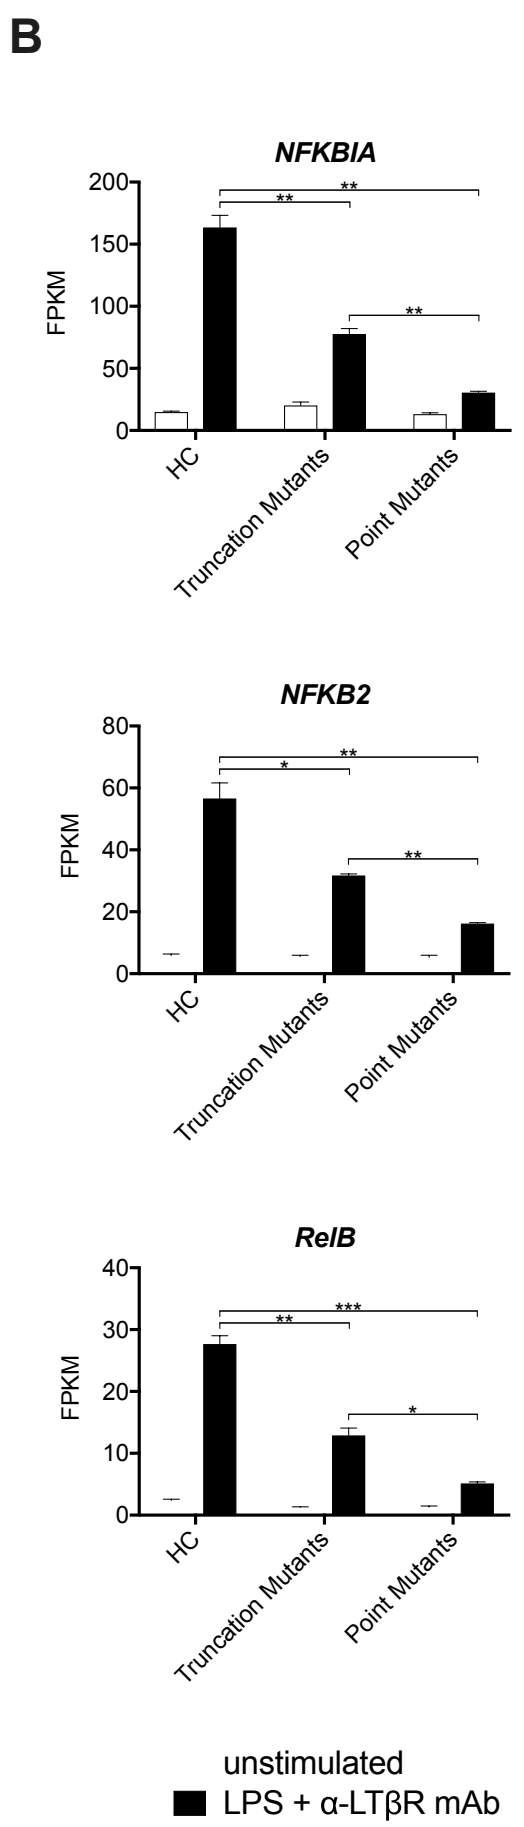

Supplemental Figure S2

**Supplemental Table E1.** Breakdown of the disease severity score of the patients.

| <b>Patient</b> | <b>Infections</b> | <b>Ectodermal dysplasia:<br/>systems affected</b> | <b>Antibody<br/>responses</b> | <b>Lymphocyte<br/>count per <math>\mu</math>l</b> | <b>Memory T<br/>and/or B cells</b> | <b>Cumulative<br/>score</b> |
|----------------|-------------------|---------------------------------------------------|-------------------------------|---------------------------------------------------|------------------------------------|-----------------------------|
| 1              | 3                 | 3                                                 | 3                             | 3                                                 | 3                                  | 15/15                       |
| 2              | 3                 | 3                                                 | 3                             | 3                                                 | 2                                  | 14/15                       |
| 3              | 3                 | 3                                                 | 3                             | 3                                                 | 3                                  | 15/15                       |
| 4              | 3                 | 3                                                 | 2                             | 3                                                 | 3                                  | 14/15                       |
| 5              | 2                 | 2                                                 | 3                             | 1                                                 | 3                                  | 11/15                       |
| 6              | 2                 | 3                                                 | 3                             | 1                                                 | 3                                  | 12/15                       |
| 7              | 3                 | 2                                                 | n.a.                          | 1                                                 | 0                                  | 6/12                        |
| 8              | 1                 | 2                                                 | 1                             | 0                                                 | 0                                  | 4/15                        |
| 9              | 2                 | 1                                                 | n.a.                          | 1                                                 | 0                                  | 4/12                        |

*n.a.*, not available.

**Genotype-phenotype correlation in autosomal dominant anhidrotic ectodermal dysplasia with immune deficiency: More severe disease and greater impairment of NF- $\kappa$ B activation in I $\kappa$ B $\alpha$  point mutants versus truncation mutants**

Daniel Petersheim, MD<sup>1,#,\*</sup>, Michel J. Massaad, PhD<sup>1,#</sup>, Saetbyul Lee, PhD<sup>1</sup>, Alessia Scarselli, MD<sup>2</sup>, Caterina Cancrini, MD<sup>2</sup>, Kunihiko Moriya, MD, PhD<sup>3</sup>, Yoji Sasahara, MD, PhD<sup>3</sup>, Arjan C. Lankester, MD, PhD<sup>4</sup>, Morna Dorsey, MD<sup>5</sup>, Daniela Di Giovanni, MD<sup>6</sup>, Liliana Bezrodnik, MD<sup>6</sup>, Hidenori Ohnishi, MD, PhD<sup>7</sup>, Ryuta Nishikomori, MD<sup>8</sup>, Kay Tanita, MD<sup>9</sup>, Hirokazu Kanegane, MD, PhD<sup>9</sup>, Tomohiro Morio, MD<sup>9</sup>, Erwin W. Gelfand, MD<sup>10</sup>, Ashish Jain, MD<sup>11</sup>, Elizabeth Secord, MD, PhD<sup>12</sup>, Capucine Picard, MD, PhD<sup>13</sup>, Jean-Laurent Casanova, MD, PhD<sup>13,14</sup>, Michael H. Albert, MD<sup>15</sup>, Troy R. Torgerson, MD, PhD<sup>16</sup> and Raif S. Geha, MD<sup>1</sup>

## SUPPLEMENTAL FIGURE LEGENDS

**Figure S1. Effect of LPS stimulation on I $\kappa$ B $\alpha$  levels in the patient with the I $\kappa$ B $\alpha$  Q9X truncating mutation.** Representative I $\kappa$ B $\alpha$  immunoblot of fibroblasts from a healthy control (HC) and the patient. Two lower molecular weight I $\kappa$ B $\alpha$  bands are evident in unstimulated fibroblasts from the patient; only the band with the lowest molecular weight increased in intensity following stimulation with increasing concentrations of LPS.

**Figure S2. I $\kappa$ B $\alpha$  point mutants impair more than I $\kappa$ B $\alpha$  truncation mutants the induction of various genes including those regulated by NF- $\kappa$ B. A.** Heat map of genes the expression of which was significantly altered by LPS+anti-LT $\beta$ R stimulation of normal fibroblasts. **B.** RNA-Seq analysis of the expression of *NFKB1A*, *NFKB2* and *RELB* mRNA in unstimulated and LPS+anti-LT $\beta$ R mAb stimulated fibroblasts from healthy controls (HC; n=3) and patients with I $\kappa$ B $\alpha$  truncation (n=2) and point mutations (n=2). Results are expressed as Fragments per Kilobase of Exon per Million (FPKM). Columns and bars represent the mean $\pm$ SD for each of the three groups. \*,  $p<0.05$ ; \*\*,  $p<0.01$ ; \*\*\*,  $p<0.001$ .
